# Supplementary material for: Theoretical study of catalytic activity modifications in CO2 methanation induced by an electric field in solid-oxide cells
Source: Royal Society of Chemistry journal article supplement (doi:10.1039/d3cy01327h), 2024-01-01
Supplement: d3cy01327h1.pdf [file d3cy01327h1.pdf]

## Supplementary Information

# **Theoretical Study of Catalytic Activity Modifications in CO<sub>2</sub> Methanation Induced by an Electric Field in Solid-Oxide Cells**

Katsuhiro Wakamatsu,<sup>\*a,b</sup> Takaaki Yasuda,<sup>a</sup> Masato Aratani<sup>b</sup> and Teppei Ogura<sup>\*a,b</sup>

<sup>a</sup> Department of Nanotechnology for Sustainable Energy, Graduate School of Science and Technology, Kwansai Gakuin University, 1 Gakuen Uegahara, Sanda, Hyogo, 669-1330, Japan

<sup>b</sup> Department of Physics, Graduate School of Science and Technology, Kwansai Gakuin University, 1 Gakuen Uegahara, Sanda, Hyogo, 669-1330, Japan

\* Corresponding author e-mail addresses: (K.W.) [katsu29yukke@gmail.com](mailto:katsu29yukke@gmail.com),  
(T.O.) [t-ogura@kwansai.ac.jp](mailto:t-ogura@kwansai.ac.jp)

### The electric dipole moment and polarizability values of surface adsorbed species with an electric field

Adsorption energy dependence on external electric fields is described as following Eq. S1, and the electric dipole moment and the effective polarizability values of adsorbed species on catalytic surfaces can be obtained by this equation<sup>1,2</sup>.

$$E_{ads, with EF} = E_{ads, without EF} - \mathbf{d} \cdot \mathbf{F} - \frac{\alpha}{2} F^2 \quad [S1]$$

where  $E_{ads, with EF}$  is the adsorption energy with external electric fields,  $E_{ads, without EF}$  is the adsorption energy without external electric fields,  $\mathbf{d}$  is an electric dipole moment,  $\alpha$  is effective polarizability and  $\mathbf{F}$  is an external electric field. Eq. S1 is based on Eqs. 17 and 18, meaning that the effect of  $\mathbf{d}$  is larger than that of  $\mathbf{p}$  when the magnitude of electric fields is small ( $F < 1 \text{ V/\AA}$ ,  $F^2$  works for  $\mathbf{d}$ ). Still, the effect of  $\mathbf{p}$  becomes the same degree as that of  $\mathbf{d}$  when the magnitude of electric fields is large ( $F \geq 1 \text{ V/\AA}$ ). The electric dipole moment and the effective polarizability values for adsorbed species on Ni (111) surface in this study and the early study reported by F. Che et al.<sup>1</sup> obtained by the equation mentioned above are shown in Table S1. The comparisons of the adsorption energy plots of H atom, C atom, CH and CH<sub>3</sub> with external electric fields between our calculation and the early report by F. Che et al. are shown in Fig. S1. Comparing these calculation results with their results, our results have a few differences. In the electric dipole moment values, positive and negative sign tendencies agree, although the magnitude of each adsorbed species is a little larger in our results. In the calculation reported by F. Che et al., 4 Ni metal layers with 11 Å vacuum layer is used as a slab model and the Perdew-Wang 91 (PW91) functional<sup>3</sup> is used as an exchange-correlation functional unlike our calculation. This may be why the magnitude of the electric dipole moment values is slightly different. In the effective polarizability values, the magnitude of each adsorbed species is also a little different from their reports and positive and negative sign tendencies (except for the H atom) do not agree with their reports. A little magnitude difference of the effective polarizability values is probably caused by the difference of calculation conditions as well as the case of electric dipole moment values. In addition, as the reason why our results have a few differences in the electric dipole moment and effective polarizability values ( $\mathbf{d}$  and  $\alpha$ ), the difference in electric field impression regions is considered. In the previous report, they used a wider external electric field range from -1.0 to 1.0 V/Å than ours from -0.5 to 0.5 V/Å, so we estimated the effective polarizability values ( $\alpha$ ) where the effort of

the electric dipole moment induced by atomic polarization ( $\mathbf{p}$ ) is small.

Table S1. Electric dipole moment and the effective polarizability values for adsorbed species on the Ni (111) surface in this study and the early study<sup>1</sup>.

| Species on slab | In this study             |                                            | In the early study        |                                            |
|-----------------|---------------------------|--------------------------------------------|---------------------------|--------------------------------------------|
|                 | $d$ [eVÅV <sup>-1</sup> ] | $\alpha$ [Å <sup>2</sup> V <sup>-1</sup> ] | $d$ [eVÅV <sup>-1</sup> ] | $\alpha$ [Å <sup>2</sup> V <sup>-1</sup> ] |
| H               | -0.034                    | -0.044                                     | -0.010                    | -0.062                                     |
| O               | -0.155                    | -0.031                                     | —                         | —                                          |
| CH              | 0.139                     | 0.191                                      | 0.076                     | -0.193                                     |
| CO              | -0.380                    | 0.438                                      | —                         | —                                          |
| CH <sub>3</sub> | 0.390                     | 0.348                                      | 0.191                     | -0.148                                     |
| CO <sub>2</sub> | -0.137                    | 0.683                                      | —                         | —                                          |
| CHO             | 0.081                     | 0.432                                      | —                         | —                                          |
| C               | -0.127                    | 0.058                                      | -0.066                    | -0.18                                      |
| OH              | 0.516                     | 0.188                                      | —                         | —                                          |
| S               | -0.025                    | 0.310                                      | —                         | —                                          |

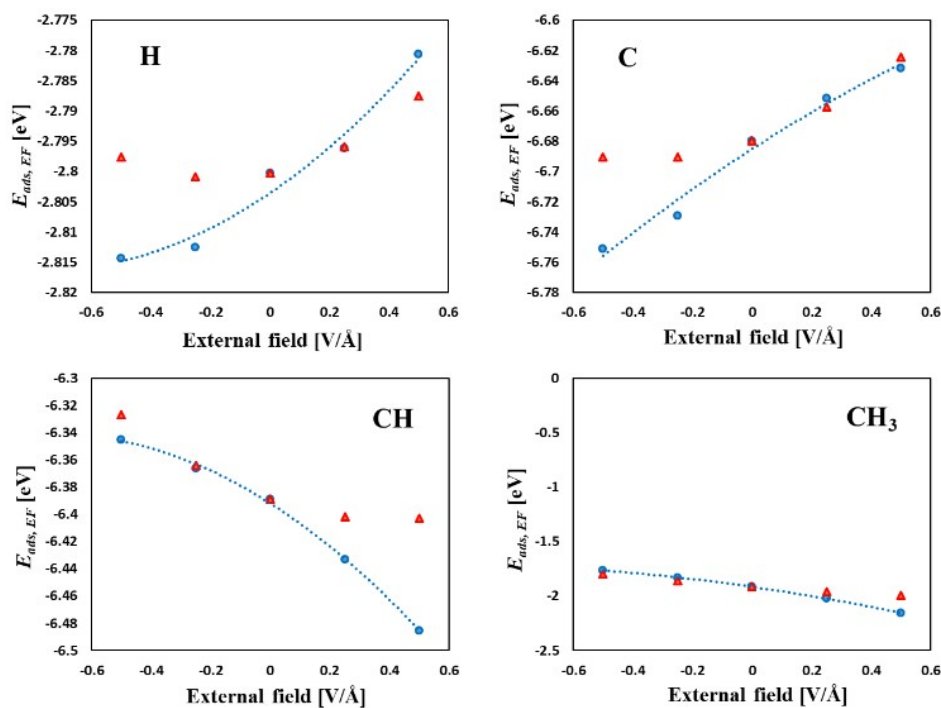

Fig. S1. Adsorption energy plots of H atom, C atom, CH and CH<sub>3</sub> with external electric fields in this study (circle markers) and the early study (triangle markers)<sup>1</sup>.

Table S2. Elementary steps in CO<sub>2</sub> methanation. (Reaction 1-51)

| Number | Reaction                                                               | <i>A</i>               | <i>E<sub>a</sub></i> [J/mol] | $\Delta H$ [J/mol] | $\Delta S$ [J/mol · K] |
|--------|------------------------------------------------------------------------|------------------------|------------------------------|--------------------|------------------------|
| 1      | H <sub>2</sub> + 2 (111)* = 2 H(111)*                                  | 3.941×10 <sup>8</sup>  | 23060                        | -41774             | -82.717                |
| 2      | H <sub>2</sub> O + (111)* = H <sub>2</sub> O(111)*                     | 1.031                  | 0                            | -18000             | -85.1                  |
| 3      | CO + (111)* = CO(111)*                                                 | 0.827                  | 0                            | -34664             | -51.237                |
| 4      | CH <sub>4</sub> + 2 (111)* = CH <sub>3</sub> (111)* + H(111)*          | 2.673×10 <sup>8</sup>  | 129000                       | 28611              | -109.84                |
| 5      | CH <sub>2</sub> O + (111)* = CH <sub>2</sub> O(111)*                   | 0.798                  | 0                            | -51000             | -156.57                |
| 6      | CH <sub>3</sub> OH + (111)* = CH <sub>3</sub> OH(111)*                 | 0.773                  | 0                            | -48000             | -101.94                |
| 7      | CO <sub>2</sub> + (111)* = CO <sub>2</sub> (111)*                      | 0.66                   | 0                            | -32000             | -90.72                 |
| 8      | CH <sub>3</sub> (111)* + (111)* = CH <sub>2</sub> (111)* + H(111)*     | 5.354×10 <sup>13</sup> | 66660                        | 3000               | -0.79                  |
| 9      | CH <sub>2</sub> (111)* + (111)* = CH(111)* + H(111)*                   | 9.484×10 <sup>12</sup> | 26030                        | -38000             | -14.02                 |
| 10     | CH(111)* + (111)* = C(111)* + H(111)*                                  | 2.321×10 <sup>14</sup> | 135740                       | 54000              | -2.33                  |
| 11     | H <sub>2</sub> O(111)* + (111)* = H(111)* + OH(111)*                   | 2.301×10 <sup>11</sup> | 91100                        | -9000              | -55.54                 |
| 12     | OH(111)* + (111)* = H(111)* + O(111)*                                  | 1.002×10 <sup>13</sup> | 82810                        | -33000             | -17.61                 |
| 13     | C(111)* + O(111)* = CO(111)* + (111)*                                  | 1.072×10 <sup>15</sup> | 206130                       | -144000            | 32.73                  |
| 14     | C(111)* + OH(111)* = COH(111)* + (111)*                                | 3.025×10 <sup>13</sup> | 125710                       | -83000             | 15.11                  |
| 15     | CH(111)* + O(111)* = CHO(111)* + (111)*                                | 3.132×10 <sup>12</sup> | 118277                       | 25000              | 17.38                  |
| 16     | CH(111)* + OH(111)* = CHOH(111)* + (111)*                              | 1.081×10 <sup>13</sup> | 123000                       | 48000              | 8.49                   |
| 17     | CHO(111)* + (111)* = H(111)* + CO(111)*                                | 9.561×10 <sup>12</sup> | 20140                        | 24829              | 143.33                 |
| 18     | COH(111)* + (111)* = H(111)* + CO(111)*                                | 4.309×10 <sup>12</sup> | 86220                        | -94000             | 0                      |
| 19     | CHOH(111)* + (111)* = H(111)* + CHO(111)*                              | 7.98×10 <sup>12</sup>  | 59623                        | -57000             | -8.72                  |
| 20     | CHOH(111)* + (111)* = H(111)* + COH(111)*                              | 4.942×10 <sup>12</sup> | 8760                         | -77000             | 4.29                   |
| 21     | CH <sub>2</sub> (111)* + O(111)* = CH <sub>2</sub> O(111)* + (111)*    | 7.146×10 <sup>12</sup> | 130470                       | 28000              | -4.18                  |
| 22     | CH <sub>2</sub> O(111)* + (111)* = H(111)* + CHO(111)*                 | 5.086×10 <sup>13</sup> | 31000                        | -42000             | 7.54                   |
| 23     | CH <sub>2</sub> O(111)* = CHOH(111)*                                   | 1.0×10 <sup>13</sup>   | 174540                       | 15000              | 16.26                  |
| 24     | CH <sub>2</sub> (111)* + OH(111)* = CH <sub>2</sub> OH(111)* + (111)*  | 3.297×10 <sup>12</sup> | 84770                        | 17000              | 3.07                   |
| 25     | CH <sub>2</sub> OH(111)* + (111)* = H(111)* + CHOH(111)*               | 7.077×10 <sup>12</sup> | 35700                        | -6000              | -8.6                   |
| 26     | CH <sub>2</sub> OH(111)* + (111)* = H(111)* + CH <sub>2</sub> O(111)*  | 5.113×10 <sup>12</sup> | 59410                        | -22000             | -24.87                 |
| 27     | CH <sub>2</sub> OH(111)* = CH <sub>3</sub> O(111)*                     | 1.0×10 <sup>13</sup>   | 188530                       | -38000             | -11.32                 |
| 28     | H(111)* + CH <sub>2</sub> OH(111)* = CH <sub>3</sub> OH(111)* + (111)* | 1.0×10 <sup>13</sup>   | 142800                       | -26000             | 38.16                  |
| 29     | CH <sub>3</sub> (111)* + O(111)* = CH <sub>3</sub> O(111)* + (111)*    | 3.256×10 <sup>13</sup> | 151480                       | 15000              | 8.57                   |
| 30     | CH <sub>3</sub> O(111)* + (111)* = H(111)* + CH <sub>2</sub> O(111)*   | 1.0×10 <sup>13</sup>   | 60780                        | 17000              | -13.54                 |
| 31     | CH <sub>3</sub> (111)* + OH(111)* = CH <sub>3</sub> OH(111)* + (111)*  | 1.0×10 <sup>13</sup>   | 124660                       | -6000              | 40.45                  |
| 32     | CH <sub>3</sub> OH(111)* + (111)* = H(111)* + CH <sub>3</sub> O(111)*  | 1.0×10 <sup>13</sup>   | 60780                        | -13000             | -49.49                 |
| 33     | OH(111)* + CO(111)* = COOH(111)* + (111)*                              | 1.0×10 <sup>13</sup>   | 101000                       | 63000              | -37.33                 |
| 34     | COOH(111)* + (111)* = H(111)* + CO <sub>2</sub> (111)*                 | 1.0×10 <sup>13</sup>   | 97000                        | -73000             | 63.1                   |
| 35     | O(111)* + CO(111)* = CO <sub>2</sub> (111)* + (111)*                   | 1.0×10 <sup>13</sup>   | 149000                       | 23000              | 43.37                  |
| 36     | 2 CO(111)* = C(111)* + CO <sub>2</sub> (111)*                          | 1.0×10 <sup>13</sup>   | 318000                       | 167000             | 10.65                  |
| 37     | C(111)* = (111)* + Carbon(111)*                                        | 17000                  | 80000                        | 0                  | 0                      |
| 38     | H <sub>2</sub> + 2 (211)* = 2 H(211)*                                  | 3.941×10 <sup>8</sup>  | 11000                        | -46774             | -82.717                |
| 39     | H <sub>2</sub> O + (211)* = H <sub>2</sub> O(211)*                     | 1.031                  | 0                            | -12000             | -85.1                  |
| 40     | CO + (211)* = CO(211)*                                                 | 0.827                  | 0                            | -44664             | -51.237                |
| 41     | CH <sub>4</sub> + 2 (211)* = H(211)* + CH <sub>3</sub> (211)*          | 7.03×10 <sup>9</sup>   | 116350.8                     | -34000             | -124.39                |
| 42     | CO <sub>2</sub> + (211)* = CO <sub>2</sub> (211)*                      | 0.66                   | 0                            | -26000             | -90.72                 |
| 43     | (211)* + CH <sub>3</sub> (211)* = H(211)* + CH <sub>2</sub> (211)*     | 5.354×10 <sup>13</sup> | 59000                        | 26000              | -0.79                  |
| 44     | (211)* + CH <sub>2</sub> (211)* = H(211)* + CH(211)*                   | 9.484×10 <sup>12</sup> | 46000                        | -45000             | -14.02                 |
| 45     | (211)* + CH(211)* = H(211)* + C(211)*                                  | 2.321×10 <sup>14</sup> | 88000                        | -17000             | -2.33                  |
| 46     | (211)* + H <sub>2</sub> O(211)* = H(211)* + OH(211)*                   | 2.301×10 <sup>11</sup> | 38000                        | -51000             | -55.54                 |
| 47     | (211)* + OH(211)* = H(211)* + O(211)*                                  | 1.002×10 <sup>13</sup> | 76000                        | -16000             | -17.61                 |
| 48     | C(211)* + O(211)* = (211)* + CO(211)*                                  | 1.6×10 <sup>13</sup>   | 160000                       | -48000             | 32.73                  |
| 49     | C(211)* + OH(211)* = (211)* + COH(211)*                                | 8.33×10 <sup>12</sup>  | 147000                       | 63000              | 15.11                  |
| 50     | CH(211)* + O(211)* = (211)* + CHO(211)*                                | 4.1×10 <sup>15</sup>   | 123263.1                     | 58000              | 17.38                  |
| 51     | (211)* + CHO(211)* = H(211)* + CO(211)*                                | 9.561×10 <sup>12</sup> | 20000                        | 32440              | 157.88                 |

Table S3. Elementary steps in CO<sub>2</sub> methanation (Reaction 52-101).

| Number | Reaction                                                           | <i>A</i>               | <i>E<sub>a</sub></i> [J/mol] | $\Delta H$ [J/mol] | $\Delta S$ [J/mol · K] |
|--------|--------------------------------------------------------------------|------------------------|------------------------------|--------------------|------------------------|
| 52     | (211)* + COH(211)* = H(211)* + CO(211)*                            | 7.3×10 <sup>12</sup>   | 43000                        | -127000            | 0                      |
| 53     | CO(211)* + OH(211)* = (211)* + COOH(211)*                          | 1.0×10 <sup>13</sup>   | 111000                       | 106500             | -37.33                 |
| 54     | (211)* + COOH(211)* = H(211)* + CO <sub>2</sub> (211)*             | 1.0×10 <sup>13</sup>   | 97000                        | -69500             | 63.1                   |
| 55     | CO(211)* + O(211)* = (211)* + CO <sub>2</sub> (211)*               | 1.35×10 <sup>14</sup>  | 145880.4                     | 53000              | 43.37                  |
| 56     | 2 CO(211)* = CO <sub>2</sub> (211)* + C(211)*                      | 1.0×10 <sup>13</sup>   | 326000                       | 101000             | 10.65                  |
| 57     | C(211)* = (211)* + Carbon(211)*                                    | 17000                  | 80000                        | 0                  | 0                      |
| 58     | CH <sub>3</sub> (111)* + (211)* = (111)* + CH <sub>3</sub> (211)*  | 1.0×10 <sup>13</sup>   | 25000                        | -60111             | -14.55                 |
| 59     | CH <sub>2</sub> (111)* + (211)* = (111)* + CH <sub>2</sub> (211)*  | 1.0×10 <sup>13</sup>   | 25000                        | -34611             | -14.55                 |
| 60     | CH(111)* + (211)* = (111)* + CH(211)*                              | 1.0×10 <sup>13</sup>   | 46000                        | -39111             | -14.55                 |
| 61     | C(111)* + (211)* = (111)* + C(211)*                                | 1.0×10 <sup>13</sup>   | 50000                        | -107611            | -14.55                 |
| 62     | H(111)* + (211)* = (111)* + H(211)*                                | 1.0×10 <sup>13</sup>   | 13000                        | -2500              | 0                      |
| 63     | H <sub>2</sub> O(111)* + (211)* = (111)* + H <sub>2</sub> O(211)*  | 1.0×10 <sup>13</sup>   | 300                          | 6000               | 0                      |
| 64     | OH(111)* + (211)* = (111)* + OH(211)*                              | 1.0×10 <sup>13</sup>   | 25000                        | -33500             | 0                      |
| 65     | O(111)* + (211)* = (111)* + O(211)*                                | 1.0×10 <sup>13</sup>   | 48000                        | -14000             | 0                      |
| 66     | CO(111)* + (211)* = (111)* + CO(211)*                              | 1.0×10 <sup>13</sup>   | 10000                        | -10000             | 0                      |
| 67     | CHO(111)* + (211)* = (111)* + CHO(211)*                            | 1.0×10 <sup>13</sup>   | 13000                        | -20111             | -14.55                 |
| 68     | COH(111)* + (211)* = (111)* + COH(211)*                            | 1.0×10 <sup>13</sup>   | 25000                        | 20500              | 0                      |
| 69     | CO <sub>2</sub> (111)* + (211)* = (111)* + CO <sub>2</sub> (211)*  | 1.0×10 <sup>13</sup>   | 0                            | 6000               | 0                      |
| 70     | H <sub>2</sub> + 2 (100)* = 2 H(100)*                              | 3.507×10 <sup>8</sup>  | 11000                        | -43774             | -82.717                |
| 71     | H <sub>2</sub> O + (100)* = H <sub>2</sub> O(100)*                 | 1.031                  | 0                            | -12000             | -85.1                  |
| 72     | CO + (100)* = CO(100)*                                             | 0.827                  | 0                            | -35664             | -51.237                |
| 73     | CH <sub>4</sub> + 2 (100)* = H(100)* + CH <sub>3</sub> (100)*      | 2.495×10 <sup>8</sup>  | 117000                       | 156440             | 20.48                  |
| 74     | CO <sub>2</sub> + (100)* = CO <sub>2</sub> (100)*                  | 0.66                   | 0                            | -26000             | -90.72                 |
| 75     | (100)* + CH <sub>3</sub> (100)* = H(100)* + CH <sub>2</sub> (100)* | 5.354×10 <sup>13</sup> | 59000                        | -15000             | -0.79                  |
| 76     | (100)* + CH <sub>2</sub> (100)* = H(100)* + CH(100)*               | 9.484×10 <sup>12</sup> | 46000                        | -70000             | -14.02                 |
| 77     | (100)* + CH(100)* = H(100)* + C(100)*                              | 2.321×10 <sup>14</sup> | 88000                        | -22000             | -2.33                  |
| 78     | (100)* + H <sub>2</sub> O(100)* = H(100)* + OH(100)*               | 2.301×10 <sup>11</sup> | 38000                        | -47000             | -55.54                 |
| 79     | (100)* + OH(100)* = H(100)* + O(100)*                              | 1.002×10 <sup>13</sup> | 114000                       | -30000             | -17.61                 |
| 80     | C(100)* + O(100)* = (100)* + CO(100)*                              | 1.110×10 <sup>13</sup> | 202000                       | 16000              | 32.73                  |
| 81     | C(100)* + OH(100)* = (100)* + COH(100)*                            | 1.018×10 <sup>13</sup> | 154000                       | 63000              | 15.11                  |
| 82     | CH(100)* + O(100)* = (100)* + CHO(100)*                            | 1.214×10 <sup>13</sup> | 195000                       | 72000              | 17.38                  |
| 83     | (100)* + CHO(100)* = H(100)* + CO(100)*                            | 9.561×10 <sup>12</sup> | 20000                        | -10374             | 76.04                  |
| 84     | (100)* + COH(100)* = H(100)* + CO(100)*                            | 2.513×10 <sup>13</sup> | 93000                        | -77000             | 0                      |
| 85     | CO(100)* + OH(100)* = (100)* + COOH(100)*                          | 1.0×10 <sup>13</sup>   | 111000                       | 95000              | -37.33                 |
| 86     | (100)* + COOH(100)* = H(100)* + CO <sub>2</sub> (100)*             | 1.0×10 <sup>13</sup>   | 97000                        | -68000             | 63.1                   |
| 87     | CO(100)* + O(100)* = (100)* + CO <sub>2</sub> (100)*               | 1.0×10 <sup>13</sup>   | 149000                       | 57000              | 43.37                  |
| 88     | 2 CO(100)* = CO <sub>2</sub> (100)* + C(100)*                      | 1.0×10 <sup>13</sup>   | 326000                       | 41000              | 10.65                  |
| 89     | C(100)* = (100)* + Carbon(100)*                                    | 1.0×10 <sup>13</sup>   | 80000                        | 0                  | 0                      |
| 90     | CH <sub>3</sub> (211)* + (100)* = (211)* + CH <sub>3</sub> (100)*  | 1.0×10 <sup>13</sup>   | 25000                        | 188940             | 144.87                 |
| 91     | CH <sub>2</sub> (211)* + (100)* = (211)* + CH <sub>2</sub> (100)*  | 1.0×10 <sup>13</sup>   | 25000                        | 146440             | 144.87                 |
| 92     | CH(211)* + (100)* = (211)* + CH(100)*                              | 1.0×10 <sup>13</sup>   | 119000                       | 119940             | 144.87                 |
| 93     | C(211)* + (100)* = (211)* + C(100)*                                | 1.0×10 <sup>13</sup>   | 196000                       | 113440             | 144.87                 |
| 94     | H(211)* + (100)* = (211)* + H(100)*                                | 1.0×10 <sup>13</sup>   | 13000                        | 1500               | 0                      |
| 95     | H <sub>2</sub> O(211)* + (100)* = (211)* + H <sub>2</sub> O(100)*  | 1.0×10 <sup>13</sup>   | 300                          | 0                  | 0                      |
| 96     | OH(211)* + (100)* = (211)* + OH(100)*                              | 1.0×10 <sup>13</sup>   | 19000                        | 2500               | 0                      |
| 97     | O(211)* + (100)* = (211)* + O(100)*                                | 1.0×10 <sup>13</sup>   | 61000                        | -13000             | 0                      |
| 98     | CO(211)* + (100)* = (211)* + CO(100)*                              | 1.0×10 <sup>13</sup>   | 3000                         | 9000               | 0                      |
| 99     | CHO(211)* + (100)* = (211)* + CHO(100)*                            | 9.87×10 <sup>11</sup>  | 6333                         | 53314              | 81.84                  |
| 100    | COH(211)* + (100)* = (211)* + COH(100)*                            | 1.0×10 <sup>13</sup>   | 25000                        | -39500             | 0                      |
| 101    | CO <sub>2</sub> (211)* + (100)* = (211)* + CO <sub>2</sub> (100)*  | 1.0×10 <sup>13</sup>   | 0                            | 0                  | 0                      |

Table S4. Direct effects on the adsorption energy with an electric field.

| External field [V/Å] | $E_{ads, EF}$ [eV] |          |           |           |                       |                       |            |          |           |          |
|----------------------|--------------------|----------|-----------|-----------|-----------------------|-----------------------|------------|----------|-----------|----------|
|                      | <b>H</b>           | <b>O</b> | <b>CH</b> | <b>CO</b> | <b>CH<sub>3</sub></b> | <b>CO<sub>2</sub></b> | <b>CHO</b> | <b>C</b> | <b>OH</b> | <b>S</b> |
| 0.50                 | -2.78              | -5.12    | -6.49     | -1.75     | -2.16                 | -0.05                 | -3.32      | -6.63    | -3.44     | -5.18    |
| 0.25                 | -2.80              | -5.16    | -6.43     | -1.81     | -2.02                 | -0.03                 | -3.27      | -6.65    | -3.30     | -5.16    |
| 0                    | -2.80              | -5.19    | -6.39     | -1.89     | -1.92                 | -0.03                 | -3.23      | -6.68    | -3.16     | -5.15    |
| -0.25                | -2.81              | -5.23    | -6.37     | -2.00     | -1.83                 | -0.08                 | -3.22      | -6.73    | -3.04     | -5.17    |
| -0.50                | -2.81              | -5.26    | -6.35     | -2.14     | -1.76                 | -0.19                 | -3.24      | -6.75    | -2.93     | -5.21    |

Table S5. Mulliken charge (upper side) and the number of electrons (bottom side) of each adsorbed species on Ni surface.

| Mulliken charge [e]   |                |        |         |       |          |         |
|-----------------------|----------------|--------|---------|-------|----------|---------|
| Species on slab       | Atom           | EF=0.5 | EF=0.25 | EF=0  | EF=-0.25 | EF=-0.5 |
| <b>H</b>              | H              | -0.27  | -0.27   | -0.27 | -0.27    | -0.27   |
| <b>O</b>              | O              | -0.52  | -0.53   | -0.55 | -0.56    | -0.57   |
| <b>CH</b>             | H              | 0.25   | 0.22    | 0.19  | 0.17     | 0.14    |
|                       | C              | -0.72  | -0.73   | -0.73 | -0.74    | -0.74   |
| <b>CO</b>             | C              | -0.08  | -0.08   | -0.09 | -0.09    | -0.09   |
|                       | O              | -0.25  | -0.29   | -0.34 | -0.38    | -0.42   |
| <b>CH<sub>3</sub></b> | H <sub>1</sub> | 0.16   | 0.15    | 0.13  | 0.12     | 0.11    |
|                       | H <sub>2</sub> | 0.16   | 0.14    | 0.13  | 0.12     | 0.1     |
|                       | H <sub>3</sub> | 0.16   | 0.15    | 0.13  | 0.12     | 0.11    |
| <b>CO<sub>2</sub></b> | C              | -1.04  | -1.03   | -1.03 | -1.03    | -1.03   |
|                       | C              | 0.95   | 0.94    | 0.93  | 0.94     | 0.94    |
|                       | O <sub>1</sub> | -0.49  | -0.49   | -0.49 | -0.49    | -0.5    |
| <b>CHO</b>            | O <sub>2</sub> | -0.49  | -0.49   | -0.49 | -0.49    | -0.5    |
|                       | H              | 0.25   | 0.22    | 0.19  | 0.17     | 0.14    |
|                       | C              | -0.28  | -0.29   | -0.3  | -0.3     | -0.31   |
| <b>C</b>              | O              | -0.37  | -0.39   | -0.41 | -0.44    | -0.46   |
|                       | C              | -0.45  | -0.46   | -0.48 | -0.49    | -0.5    |
| <b>OH</b>             | H              | 0.47   | 0.46    | 0.44  | 0.42     | 0.4     |
|                       | O              | -0.78  | -0.78   | -0.79 | -0.78    | -0.78   |
| <b>S</b>              | S              | 0.02   | -0.03   | -0.07 | -0.12    | -0.17   |

| The number of electrons |        |         |        |          |         |
|-------------------------|--------|---------|--------|----------|---------|
| Species on slab         | EF=0.5 | EF=0.25 | EF=0   | EF=-0.25 | EF=-0.5 |
| <b>H</b>                | 1.251  | 1.256   | 1.260  | 1.262    | 1.262   |
| <b>O</b>                | 6.519  | 6.528   | 6.544  | 6.551    | 6.567   |
| <b>CH</b>               | 5.439  | 5.471   | 5.502  | 5.535    | 5.566   |
| <b>CO</b>               | 10.247 | 10.300  | 10.353 | 10.383   | 10.431  |
| <b>CH<sub>3</sub></b>   | 7.465  | 7.515   | 7.560  | 7.591    | 7.634   |
| <b>CO<sub>2</sub></b>   | 15.770 | 15.794  | 15.794 | 15.799   | 15.794  |
| <b>CHO</b>              | 11.297 | 11.377  | 11.431 | 11.496   | 11.547  |
| <b>C</b>                | 4.442  | 4.458   | 4.471  | 4.485    | 4.515   |
| <b>OH</b>               | 7.248  | 7.284   | 7.300  | 7.314    | 7.339   |
| <b>S</b>                | 5.947  | 5.997   | 6.045  | 6.096    | 6.139   |

Table S6. Mulliken charge of 3-fold Ni atoms (average) or top Ni atom in the case of each adsorbed species.

| Species on slab             | EF=0.5 | EF=0.25 | EF=0  | EF=-0.25 | EF=-0.5 |
|-----------------------------|--------|---------|-------|----------|---------|
| <b>H (fcc)</b>              | 0.07   | 0.06    | 0.05  | 0.03     | 0.02    |
| <b>O (fcc)</b>              | 0.18   | 0.17    | 0.16  | 0.15     | 0.15    |
| <b>CH (fcc)</b>             | 0.17   | 0.16    | 0.15  | 0.14     | 0.13    |
| <b>CO (hcp)</b>             | 0.11   | 0.10    | 0.09  | 0.09     | 0.08    |
| <b>CH<sub>3</sub> (fcc)</b> | 0.18   | 0.17    | 0.17  | 0.16     | 0.15    |
| <b>CO<sub>2</sub> (top)</b> | 0.00   | -0.02   | -0.04 | -0.05    | -0.07   |
| <b>CHO (hcp)</b>            | 0.13   | 0.13    | 0.13  | 0.13     | 0.12    |
| <b>C (hcp)</b>              | 0.13   | 0.12    | 0.11  | 0.09     | 0.08    |
| <b>OH (fcc)</b>             | 0.12   | 0.12    | 0.11  | 0.10     | 0.09    |
| <b>S (fcc)</b>              | -0.06  | -0.07   | -0.07 | -0.08    | -0.08   |

Table S7. Relative value of C, OH, and S species based on the adsorption energy without an electric field.

| External field [V/Å] | $\Delta E_{ads, EF}$ [eV] |           |          |
|----------------------|---------------------------|-----------|----------|
|                      | <b>C</b>                  | <b>OH</b> | <b>S</b> |
| 0.50                 | 0.05                      | -0.28     | -0.03    |
| 0.25                 | 0.03                      | -0.14     | -0.01    |
| -0.25                | -0.05                     | 0.12      | -0.02    |
| -0.50                | -0.07                     | 0.23      | -0.06    |

Table S8. Direct effects on the surface reaction energy with an electric field.

| External field [V/Å] | $E_{rxn, EF}$ [eV]                                      |                                                          |                                                            |
|----------------------|---------------------------------------------------------|----------------------------------------------------------|------------------------------------------------------------|
|                      | $\text{CHO}^* + * \rightarrow \text{CH}^* + \text{O}^*$ | $\text{CO}_2^* + * \rightarrow \text{CO}^* + \text{O}^*$ | $\text{CH}_3^* + \text{H}^* \rightarrow \text{CH}_4 + 2^*$ |
| 0.5                  | -0.27                                                   | -0.70                                                    | 0.23                                                       |
| 0.25                 | -0.31                                                   | -0.82                                                    | 0.11                                                       |
| 0                    | -0.33                                                   | -0.92                                                    | 0.01                                                       |
| -0.25                | -0.34                                                   | -1.02                                                    | -0.07                                                      |
| -0.5                 | -0.33                                                   | -1.08                                                    | -0.13                                                      |

Table S9. Activation barrier parameters of RDSs under the electric field magnitude  $EF = 0, \pm 0.25, \text{ or } \pm 0.5 \text{ V/Å}$ .

| Facet  | Reaction                                                   | Reaction number | $E_a$ [J/mol] |           |        |            |           |
|--------|------------------------------------------------------------|-----------------|---------------|-----------|--------|------------|-----------|
|        |                                                            |                 | EF = 0.5      | EF = 0.25 | EF = 0 | EF = -0.25 | EF = -0.5 |
| (111)* | $\text{CH}_3^* + \text{H}^* \rightarrow \text{CH}_4 + 2^*$ | 4               | 150324        | 138872    | 129000 | 122194     | 115626    |
|        | $\text{CHO}^* + * \rightarrow \text{CH}^* + \text{O}^*$    | 15              | 125964        | 120826    | 118277 | 116217     | 116576    |
|        | $\text{CO}_2^* + * \rightarrow \text{CO}^* + \text{O}^*$   | 35              | 171035        | 158375    | 149000 | 139286     | 132608    |
| (211)* | $\text{CH}_3^* + \text{H}^* \rightarrow \text{CH}_4 + 2^*$ | 41              | 137675        | 126223    | 116351 | 109545     | 102976    |
|        | $\text{CHO}^* + * \rightarrow \text{CH}^* + \text{O}^*$    | 50              | 130950        | 125812    | 123263 | 121203     | 121562    |
|        | $\text{CO}_2^* + * \rightarrow \text{CO}^* + \text{O}^*$   | 55              | 167916        | 155255    | 145880 | 136166     | 129489    |
| (100)* | $\text{CH}_3^* + \text{H}^* \rightarrow \text{CH}_4 + 2^*$ | 73              | 138324        | 126872    | 117000 | 110194     | 103626    |
|        | $\text{CHO}^* + * \rightarrow \text{CH}^* + \text{O}^*$    | 82              | 202687        | 197549    | 195000 | 192940     | 193299    |
|        | $\text{CO}_2^* + * \rightarrow \text{CO}^* + \text{O}^*$   | 87              | 171035        | 158375    | 149000 | 139286     | 132608    |

Table S10. Effects on the adsorption energy with co-adsorbed oxygen atoms.

| O co-adsorption coverage: $\theta$ | $E_{ads, co-ad O}$ [eV] |       |       |       |                 |                 |       |
|------------------------------------|-------------------------|-------|-------|-------|-----------------|-----------------|-------|
|                                    | H                       | O     | CH    | CO    | CH <sub>3</sub> | CO <sub>2</sub> | CHO   |
| $\theta=0$ (2x2)                   | -2.79                   | -5.18 | -6.40 | -1.86 | -1.87           | -0.06           | -3.27 |
| $\theta=0$ (3x2)                   | -2.76                   | -5.17 | -6.33 | -1.82 | -1.81           | 0.01            | -3.16 |
| $\theta=0$ (3x3)                   | -2.79                   | -5.12 | -6.37 | -1.85 | -1.89           | -0.04           | -3.21 |
| $\theta=1/9$                       | -2.78                   | -5.12 | -6.35 | -1.87 | -1.94           | -0.09           | -3.23 |
| $\theta=1/6$                       | -2.69                   | -4.83 | -6.11 | -1.69 | -1.94           | -0.03           | -3.01 |
| $\theta=2/9$                       | -2.74                   | -5.05 | -6.31 | -1.80 | -1.92           | -0.07           | -3.26 |
| $\theta=1/4$                       | -2.61                   | -4.30 | -5.86 | -1.42 | -1.13           | -0.06           | -2.49 |
| $\theta=3/9$                       | -2.56                   | -4.27 | -5.62 | -1.20 | -1.04           | -0.07           | -2.42 |

Table S11. Effects on the surface reaction energy with co-adsorbed oxygen atoms.



| O co-adsorption coverage: $\theta$ | $E_{rxn,co-ad O}$ [eV]                                  |                                                          |                                                            |
|------------------------------------|---------------------------------------------------------|----------------------------------------------------------|------------------------------------------------------------|
|                                    | $\text{CHO}^* + * \rightarrow \text{CH}^* + \text{O}^*$ | $\text{CO}_2^* + * \rightarrow \text{CO}^* + \text{O}^*$ | $\text{CH}_3^* + \text{H}^* \rightarrow \text{CH}_4 + 2^*$ |
| $\theta=0$ (2x2)                   | -0.37                                                   | -0.74                                                    | -0.08                                                      |
| $\theta=0$ (3x2)                   | -0.44                                                   | -0.80                                                    | -0.11                                                      |
| $\theta=0$ (3x3)                   | -0.37                                                   | -0.72                                                    | -0.03                                                      |
| $\theta=1/9$                       | -0.32                                                   | -0.69                                                    | 0.01                                                       |
| $\theta=1/6$                       | -0.01                                                   | -0.28                                                    | -0.08                                                      |
| $\theta=2/9$                       | -0.19                                                   | -0.57                                                    | -0.06                                                      |
| $\theta=1/4$                       | 0.24                                                    | 0.55                                                     | -0.97                                                      |
| $\theta=3/9$                       | 0.44                                                    | 0.81                                                     | -1.11                                                      |

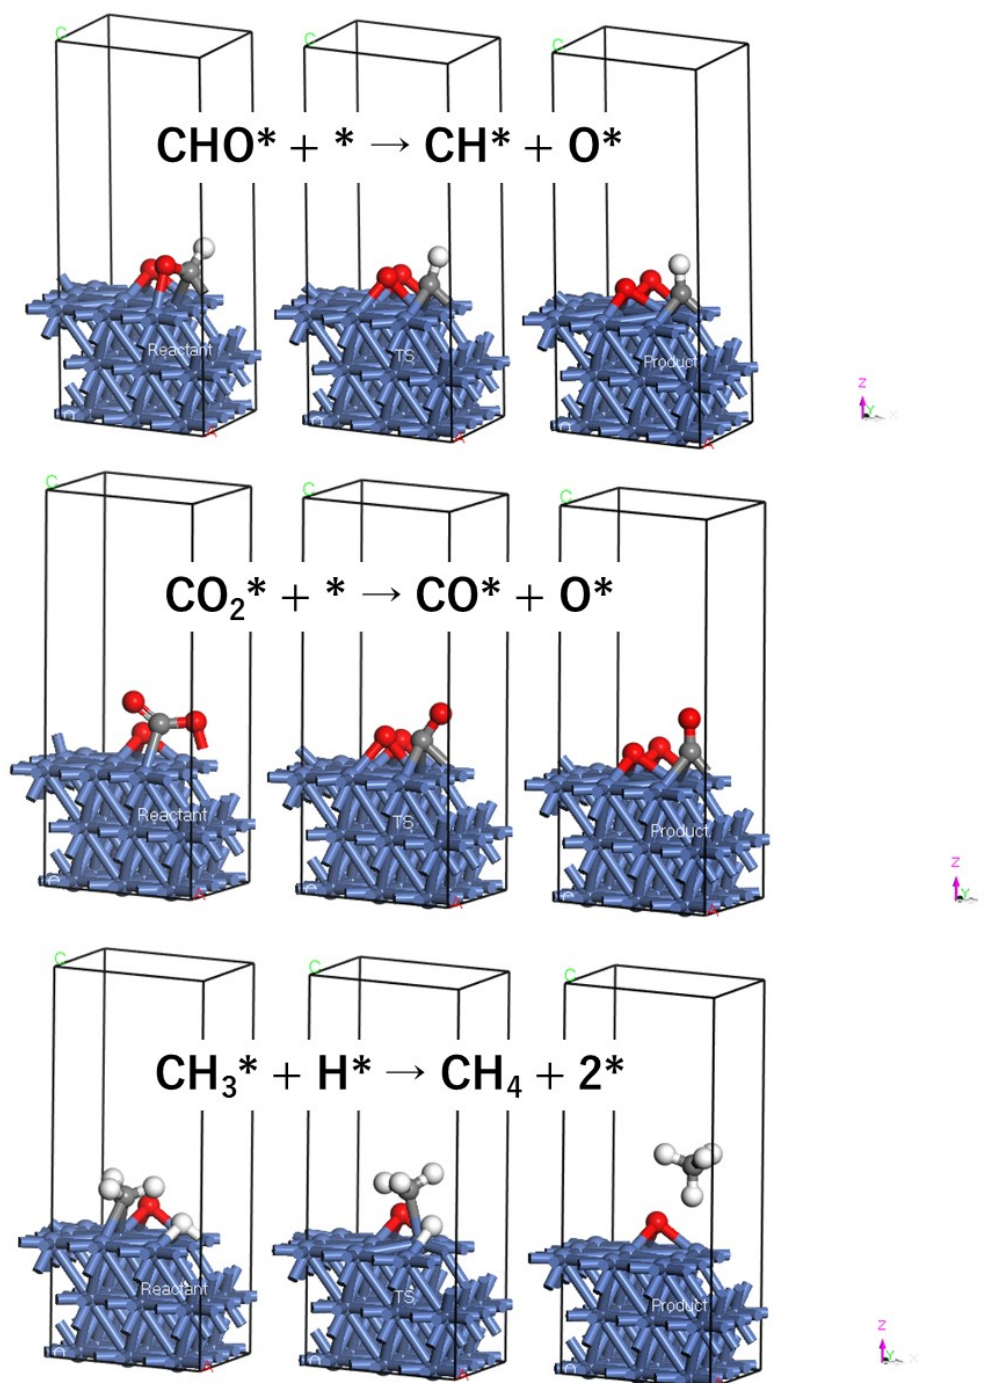

Fig. S2. Configurations of the initial step (reactants, left side), transition state (middle side), and final step (products, right side) geometries for CHO dissociation, CO<sub>2</sub> dissociation, and CH<sub>4</sub> desorption on Ni (111) facet under oxygen atom coverage  $\theta = 1/9$ .

Table S12. Activation barrier parameters of RDSs under oxygen atom coverage  $\theta = 0$ ,  $1/9$ , and  $2/9$ .

| Facet  | Reaction                                                   | Reaction number | $E_a$ [J/mol] |                |                |
|--------|------------------------------------------------------------|-----------------|---------------|----------------|----------------|
|        |                                                            |                 | $\theta = 0$  | $\theta = 1/9$ | $\theta = 2/9$ |
| (111)* | $\text{CH}_3^* + \text{H}^* \rightarrow \text{CH}_4 + 2^*$ | 4               | 129000        | 79811          | 63772          |
|        | $\text{CHO}^* + ^* \rightarrow \text{CH}^* + \text{O}^*$   | 15              | 118277        | 137375         | 160567         |
|        | $\text{CO}_2^* + ^* \rightarrow \text{CO}^* + \text{O}^*$  | 35              | 149000        | 165077         | 165552         |
| (211)* | $\text{CH}_3^* + \text{H}^* \rightarrow \text{CH}_4 + 2^*$ | 41              | 116351        | 67162          | 51122          |
|        | $\text{CHO}^* + ^* \rightarrow \text{CH}^* + \text{O}^*$   | 50              | 123263        | 142361         | 165554         |
|        | $\text{CO}_2^* + ^* \rightarrow \text{CO}^* + \text{O}^*$  | 55              | 145880        | 161957         | 162432         |
| (100)* | $\text{CH}_3^* + \text{H}^* \rightarrow \text{CH}_4 + 2^*$ | 73              | 117000        | 67811          | 51772          |
|        | $\text{CHO}^* + ^* \rightarrow \text{CH}^* + \text{O}^*$   | 82              | 195000        | 214098         | 237290         |
|        | $\text{CO}_2^* + ^* \rightarrow \text{CO}^* + \text{O}^*$  | 87              | 149000        | 165077         | 165552         |

## References

- [1] F. Che, R. Zhang, A. J. Hensley, S. Ha and J. S. McEwen, *Phys. Chem. Chem. Phys.*, 2014, **16**, 2399.
- [2] J.-S. McEwen, P. Gaspard, T. Visart de Bocarmé and N. Kruse, *J. Phys. Chem. C*, 2009, **113**, 17045.
- [3] J. P. Perdew and Y. Wang, *Phys. Rev. B: Condens. Matter Mater. Phys.*, 1992, **45**, 13244.
